# Supplementary material for: Association between sleep traits and epilepsy risk: a two-sample Mendelian randomization study
Source: Research Square preprint supplement (doi:10.21203/rs.3.rs-5665142/v1), 2024-12-24
Supplement: Supplementary file 1 [file 19bf94c4ecf37f4f602b3183.docx]

**Supplement Table 1**. The sources of SNPs associated with exposure and outcome.

| **Phenotype** | **Sample size**  **(Case)** | **GWAS ID** | **Consortium** | **PMID** |
| --- | --- | --- | --- | --- |
| **Europeans** | | | | |
| **Exposures** |  |  |  |  |
| Getting up in morning | 336,501 | ukb-a-10 | Neale Lab |  |
| Sleep apnoea | 463,010(2,320) | ukb-b-16781 | MRC-IEU(UKBB) |  |
| Sleeplessness/insomnia | 463,010 | ukb-b-3957 | MRC-IEU(UKBB) |  |
| Sleep duration | 460,099 | ukb-b-4424 | MRC-IEU(UKBB) |  |
| Sleep duration (undersleepers) | 110,188 | ebi-a-GCST006686 |  | 27494321 |
| Sleep duration (oversleepers) | 91,306 | ebi-a-GCST006685 |  | 27494321 |
| Nap during day | 462,400 | ukb-b-4616 | MRC-IEU(UKBB) | 29875488 |
| Morning/evening person (chronotype) | 413,343 | ukb-b-4956 | MRC-IEU(UKBB) | 29875488 |
| Daytime dozing/sleeping (narcolepsy) | 406,913 | ukb-b-5776 | MRC-IEU(UKBB) | 29875488 |
| **Outcomes** |  |  |  |  |
| Epilepsy | 182,367 (6,260) | finn-b-G6_EPLEPSY | MRC-IEU (FinnGEN) |  |
| Focal epilepsy | 213,461 (929) | finn-b-FE | MRC-IEU (FinnGEN) |  |
| Generalized epilepsy | 214,313 (1,781) | finn-b-GE | MRC-IEU (FinnGEN) |  |
| **East Asians** | | | | |
| **Exposures** |  |  |  |  |
| Sleep apnoea | 178,337 | ebi-a-GCST90018696 |  | 34594039 |
| Sleep duration | 2,631 | ukb-e-1160_EAS | MRC-IEU(UKBB) |  |
| Morning/evening person (chronotype) | 2,343 | ukb-e-1180_EAS | MRC-IEU(UKBB) |  |
| Sleeplessness/insomnia | 2,654 | ukb-e-1200_EAS | MRC-IEU(UKBB) |  |
| Daytime dozing/sleeping (narcolepsy) | 2,582 | ukb-e-1220_EAS | MRC-IEU(UKBB) |  |
| Getting up in morning | 2,640 | ukb-e-1170_EAS | MRC-IEU(UKBB) |  |
| Nap during day | 2,606 | ukb-e-1190_EAS | MRC-IEU(UKBB) |  |
| **Outcomes** |  |  |  |  |
| Epilepsy | 212,453 (2,143) | bbj-a-115 | Biobank Japan |  |

Note: SNPs, single nucleotide polymorphisms; GWAS, genome-wide association study.

**Supplement Table 2**. The screening process and strength tests for SNPs associated with sleep traits and epilepsy in East Asians.

| **Outcome and exposure** | **Selected SNP (*P*<5E-06)** | **Omitted LD SNP** | **Drop**  **palindromic SNP** | **F-value** | **R2(%)** |
| --- | --- | --- | --- | --- | --- |
| **Epilepsy** |  |  |  |  |  |
| Sleep apnoea | 36 | 2 | 2 | 22 | 0.024 |
| Sleep duration | 44 | 6 | 4 | 26 | 4.651 |
| Morning/evening person (chronotype) | 11 | 4 | 3 | 23 | 2.846 |
| Sleeplessness/insomnia | 74 | 9 | 7 | 24 | 6.008 |
| Daytime dozing/sleeping (narcolepsy) | 65 | 11 | 5 | 23 | 5.139 |
| Getting up in morning | 0 | 0 | 0 | - | - |
| Nap during day | 0 | 0 | 0 | - | - |

Note: SNPs, single nucleotide polymorphisms; LD, linkage disequilibrium.

**Supplement Table 3**. The results of the weighted median and weighted mode methods for the associated between sleep traits and epilepsy in Europeans.

| **Variables** | **SNPs (n)** | **Weighted median** | | **Weighted mode** | |
| --- | --- | --- | --- | --- | --- |
| **OR (95%*CI*)** | ***P*** | **OR (95%*CI*)** | ***P*** |
| **Epilepsy** |  |  |  |  |  |
| Getting up in morning | 38 | 0.678 (0.314-1.464) | 0.323 | 0.810 (0.200-3.276) | 0.769 |
| Sleeplessness/insomnia | 39 | 1.505 (0.671-3.379) | 0.321 | 2.426 (0.658-8.941) | 0.191 |
| Sleep duration | 69 | 1.091 (0.576-2.065) | 0.790 | 1.949 (0.568-6.691) | 0.293 |
| Nap during day | 86 | 0.910 (0.446-1.857) | 0.794 | 0.847 (0.239-3.002) | 0.797 |
| Morning/evening person (chronotype) | 150 | 1.440 (1.026-2.022) | 0.035 | 1.515 (0.609-3.768) | 0.373 |
| Daytime dozing/sleeping (narcolepsy) | 31 | 0.661 (0.166-2.642) | 0.559 | 0.619 (0.061-6.268) | 0.688 |
| **Focal epilepsy** |  |  |  |  |  |
| Getting up in morning | 38 | 0.392 (0.059-2.616) | 0.334 | 0.130 (0.002-8.084) | 0.339 |
| Sleeplessness/insomnia | 39 | 0.454 (0.047-4.426) | 0.497 | 0.566 (0.020-16.103) | 0.741 |
| Sleep duration | 69 | 0.707 (0.137-3.647) | 0.679 | 1.569 (0.055-44.468) | 0.793 |
| Nap during day | 86 | 0.551 (0.093-3.259) | 0.511 | 0.683 (0.026-17.671) | 0.819 |
| Morning/evening person (chronotype) | 150 | 1.413 (0.609-3.279) | 0.420 | 0.835 (0.093-7.513) | 0.872 |
| Daytime dozing/sleeping (narcolepsy) | 31 | 0.308 (0.006-14.571) | 0.549 | 1.573 (0.002-1304.190) | 0.896 |
| **Generalized epilepsy** |  |  |  |  |  |
| Getting up in morning | 38 | 0.206 (0.054-0.794) | 0.022 | 0.181 (0.014-2.262) | 0.193 |
| Sleeplessness/insomnia | 39 | 2.259 (0.472-10.819) | 0.308 | 2.062 (0.178-23.831) | 0.566 |
| Sleep duration | 69 | 1.916 (0.580-6.333) | 0.286 | 2.819 (0.290-27.386) | 0.375 |
| Nap during day | 86 | 0.340 (0.086-1.349) | 0.125 | 0.228 (0.015-3.362) | 0.284 |
| Morning/evening person (chronotype) | 150 | 1.392 (0.757-2.560) | 0.287 | 1.156 (0.224-5.958) | 0.863 |
| Daytime dozing/sleeping (narcolepsy) | 31 | 0.377 (0.028-5.142) | 0.464 | 0.186 (0.002-22.511) | 0.497 |

Note: SNPs, single nucleotide polymorphisms; OR, odds ratio; CI, confidence interval.

**Supplement Table 4**. The MR-PRESSO and Radial test for the associated between sleep traits and epilepsy in Europeans.

| **Variables** | **MR-PRESSO** | | **MR-PRESSO**  **(Outlier corrected)** | | **Radial MR** | | **Radial MR**  **(Outlier corrected)** | |
| --- | --- | --- | --- | --- | --- | --- | --- | --- |
| **OR (95%*CI*)** | ***P*** | **OR (95%*CI*)** | ***P*** | **OR (95%*CI*)** | ***P*** | **OR (95%*CI*)** | ***P*** |
| **Epilepsy** |  |  |  |  |  |  |  |  |
| Getting up in morning | 0.354 (0.198-0.631) | 0.001 |  |  | 0.354 (0.198-0.631) | 0.000 |  |  |
| Sleeplessness/insomnia | 1.367 (0.884-2.115) | 0.168 |  |  | 1.367 (0.884-2.115) | 0.160 |  |  |
| Sleep duration | 0.950 (0.595-1.516) | 0.830 |  |  | 0.950 (0.595-1.516) | 0.829 |  |  |
| Nap during day | 1.152 (0.702-1.891) | 0.577 |  |  | 1.152 (0.702-1.891) | 0.576 |  |  |
| Morning/evening person (chronotype) | 1.723 (0.942-3.149) | 0.079 |  |  | 1.371 (1.082-1.739) | 0.009 |  |  |
| Daytime dozing/sleeping (narcolepsy) | 0.407 (0.018-9.099) | 0.575 |  |  | 1.305 (0.437-3.897) | 0.634 | 0.902 (0.349-2.328) | 0.831 |
| **Focal epilepsy** |  |  |  |  |  |  |  |  |
| Getting up in morning | 0.304 (0.095-0.971) | 0.052 |  |  | 0.304 (0.095-0.971) | 0.045 |  |  |
| Sleeplessness/insomnia | 0.766 (0.212-2.768) | 0.686 |  |  | 0.766 (0.212-2.768) | 0.684 |  |  |
| Sleep duration | 0.811 (0.275-2.394) | 0.705 |  |  | 0.811 (0.275-2.394) | 0.704 |  |  |
| Nap during day | 0.405 (0.141-1.159) | 0.096 |  |  | 0.405 (0.141-1.159) | 0.092 |  |  |
| Morning/evening person (chronotype) | 1.371 (1.082-1.739) | 0.010 | 1.607 (0.921-2.804) | 0.097 | 1.723 (0.942-3.150) | 0.077 | 1.618 (0.904-2.899) | 0.105 |
| Daytime dozing/sleeping (narcolepsy) | 1.305 (0.437-3.897) | 0.637 | 0.250 (0.016-3.952) | 0.333 | 0.407 (0.018-9.099) | 0.571 | 0.166 (0.010-2.849) | 0.215 |
| **Generalized epilepsy** |  |  |  |  |  |  |  |  |
| Getting up in morning | 0.256 (0.111-0.590) | 0.003 |  |  | 0.256 (0.111-0.590) | 0.001 |  |  |
| Sleeplessness/insomnia | 2.223 (0.797-6.197) | 0.135 |  |  | 2.222 (0.797-6.197) | 0.127 |  |  |
| Sleep duration | 1.130 (0.536-2.384) | 0.749 |  |  | 1.130 (0.536-2.384) | 0.748 |  |  |
| Nap during day | 0.729 (0.268-1.981) | 0.537 |  |  | 0.729 (0.268-1.981) | 0.535 |  |  |
| Morning/evening person (chronotype) | 1.618 (1.061-2.467) | 0.027 |  |  | 1.618 (1.061-2.467) | 0.025 |  |  |
| Daytime dozing/sleeping (narcolepsy) | 1.584 (0.257-9.771) | 0.624 |  |  | 1.584 (0.257-9.771) | 0.620 |  |  |

Note: MR, Mendelian randomization; IVW, inverse-variance weighted; OR, odds ratio; CI, confidence interval.

**Supplement Table 5**. The results of the weighted median and weighted mode methods for the associated between sleep traits and epilepsy in East Asians.

| **Variables** | **SNPs (n)** | **Weighted median** | | **Weighted mode** | |
| --- | --- | --- | --- | --- | --- |
| **OR (95%*CI*)** | ***P*** | **OR (95%*CI*)** | ***P*** |
| **Epilepsy** |  |  |  |  |  |
| Sleep apnoea | 2 | - | - | - | - |
| Sleep duration | 4 | 1.149 (0.803-1.642) | 0.447 | 1.291 (0.786-2.120) | 0.388 |
| Morning/evening person (chronotype) | 3 | 0.936 (0.647-1.353) | 0.724 | 0.928 (0.609-1.413) | 0.760 |
| Sleeplessness/insomnia | 7 | 1.357 (0.950-1.938) | 0.093 | 1.383 (0.816-2.345) | 0.274 |
| Daytime dozing/sleeping (narcolepsy) | 4 | 1.068 (0.596-1.915) | 0.825 | 1.156 (0.563-2.370) | 0.713 |

Note: SNPs, single nucleotide polymorphisms; OR, odds ratio; CI, confidence interval.

**Supplement Table 6**. The MR-PRESSO and Radial test for the associated between sleep traits and epilepsy in East Asians.

| **Variables** | **MR-PRESSO** | | **Outlier** | **Radial MR** | | **Outlier** |
| --- | --- | --- | --- | --- | --- | --- |
| **OR (95%*CI*)** | ***P*** | **OR (95%*CI*)** | ***P*** |
| **Epilepsy** |  |  |  |  |  |  |
| Sleep apnoea | - | - | - | - | - | - |
| Sleep duration | 1.111 (0.886-1.393) | 0.43 | NA | - | - |  |
| Morning/evening person (chronotype) | - | - | - | - | - | - |
| Sleeplessness/insomnia | 1.381 (1.142-1.671) | 0.016 | NA | 1.381 (1.142-1.670) | 0.001 | NA |
| Daytime dozing/sleeping (narcolepsy) | 0.899 (0.529-1.527) | 0.714 | NA | 0.899 (0.529-1.527) | 0.693 | NA |

Note: MR, Mendelian randomization; IVW, inverse-variance weighted; OR, odds ratio; CI, confidence interval.


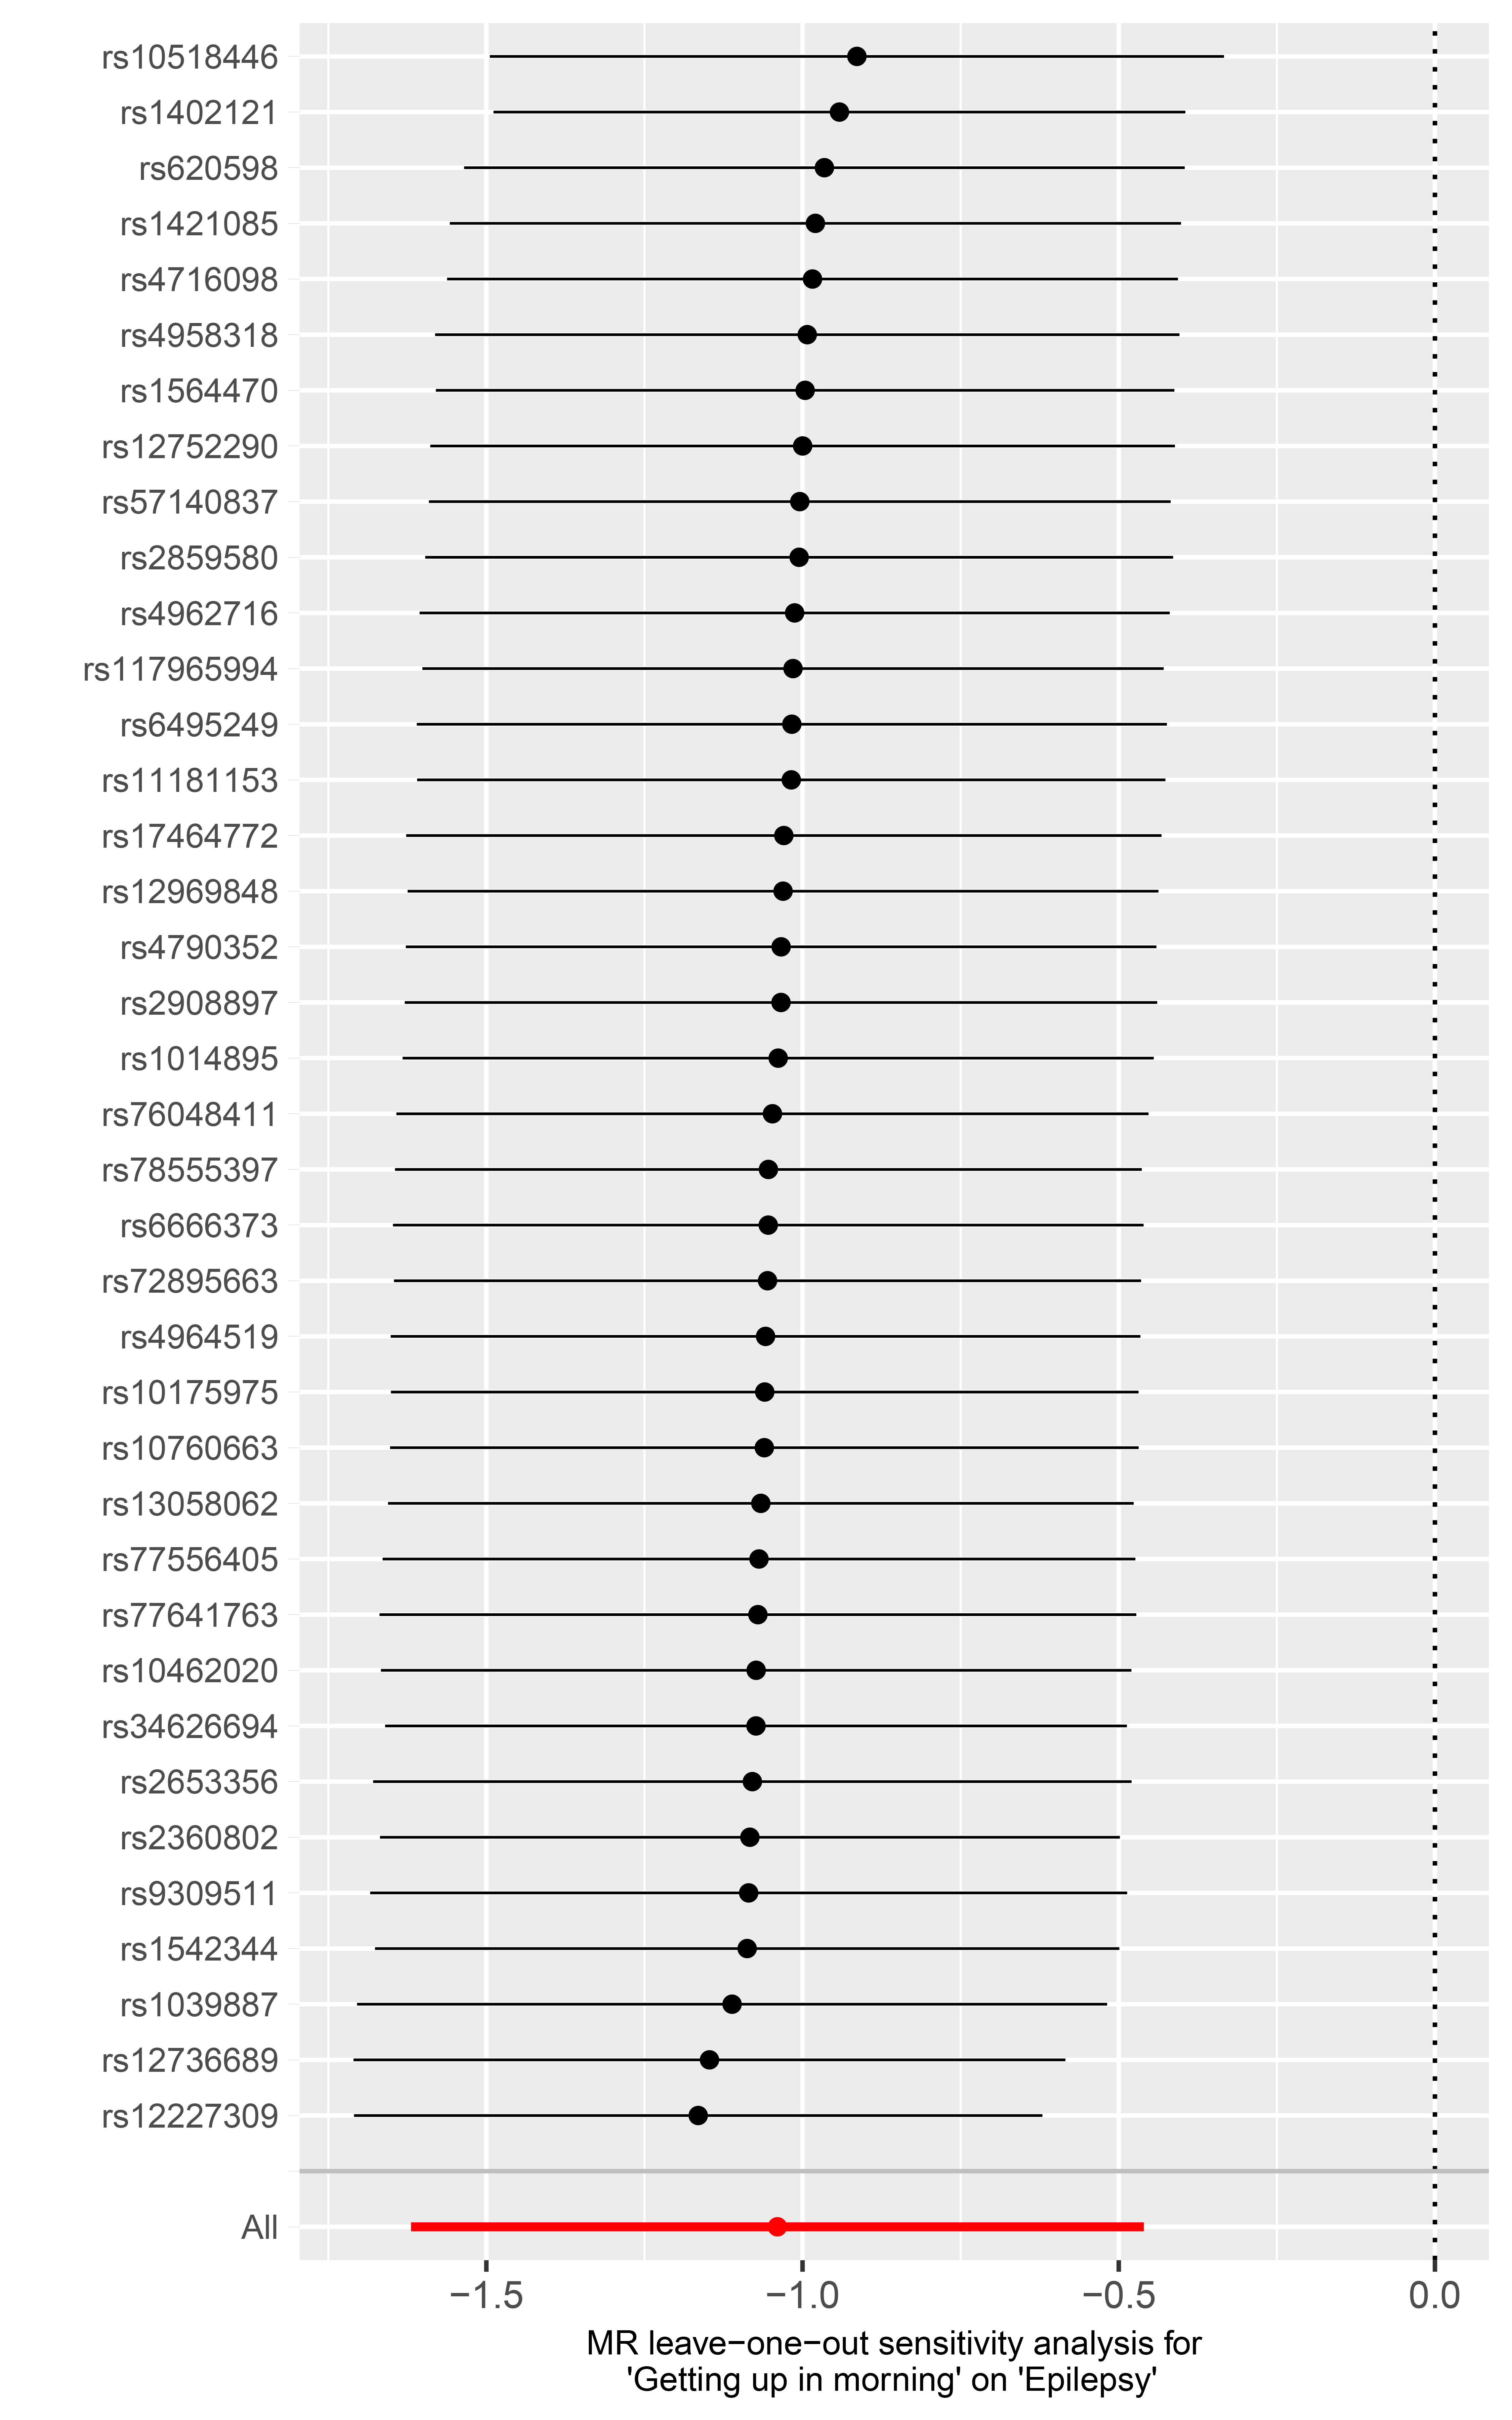


**Supplement Figure 1A**

**
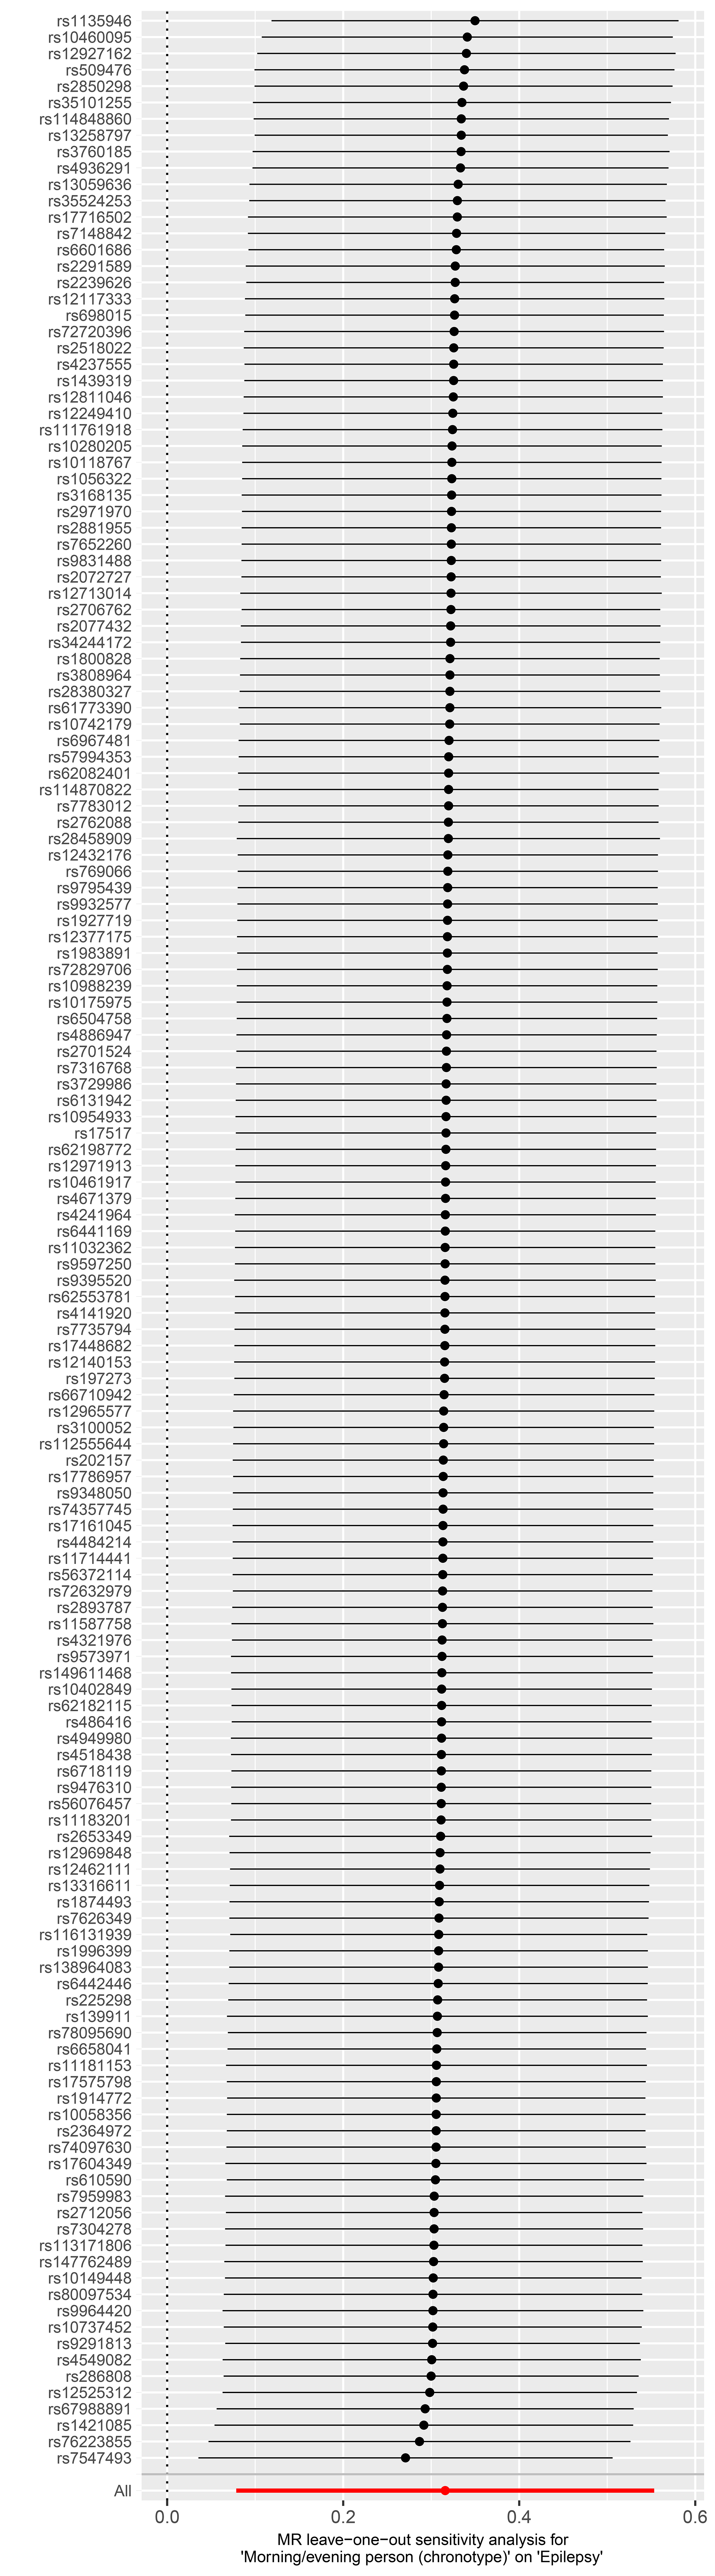
**

**Supplement Figure 1B**

**
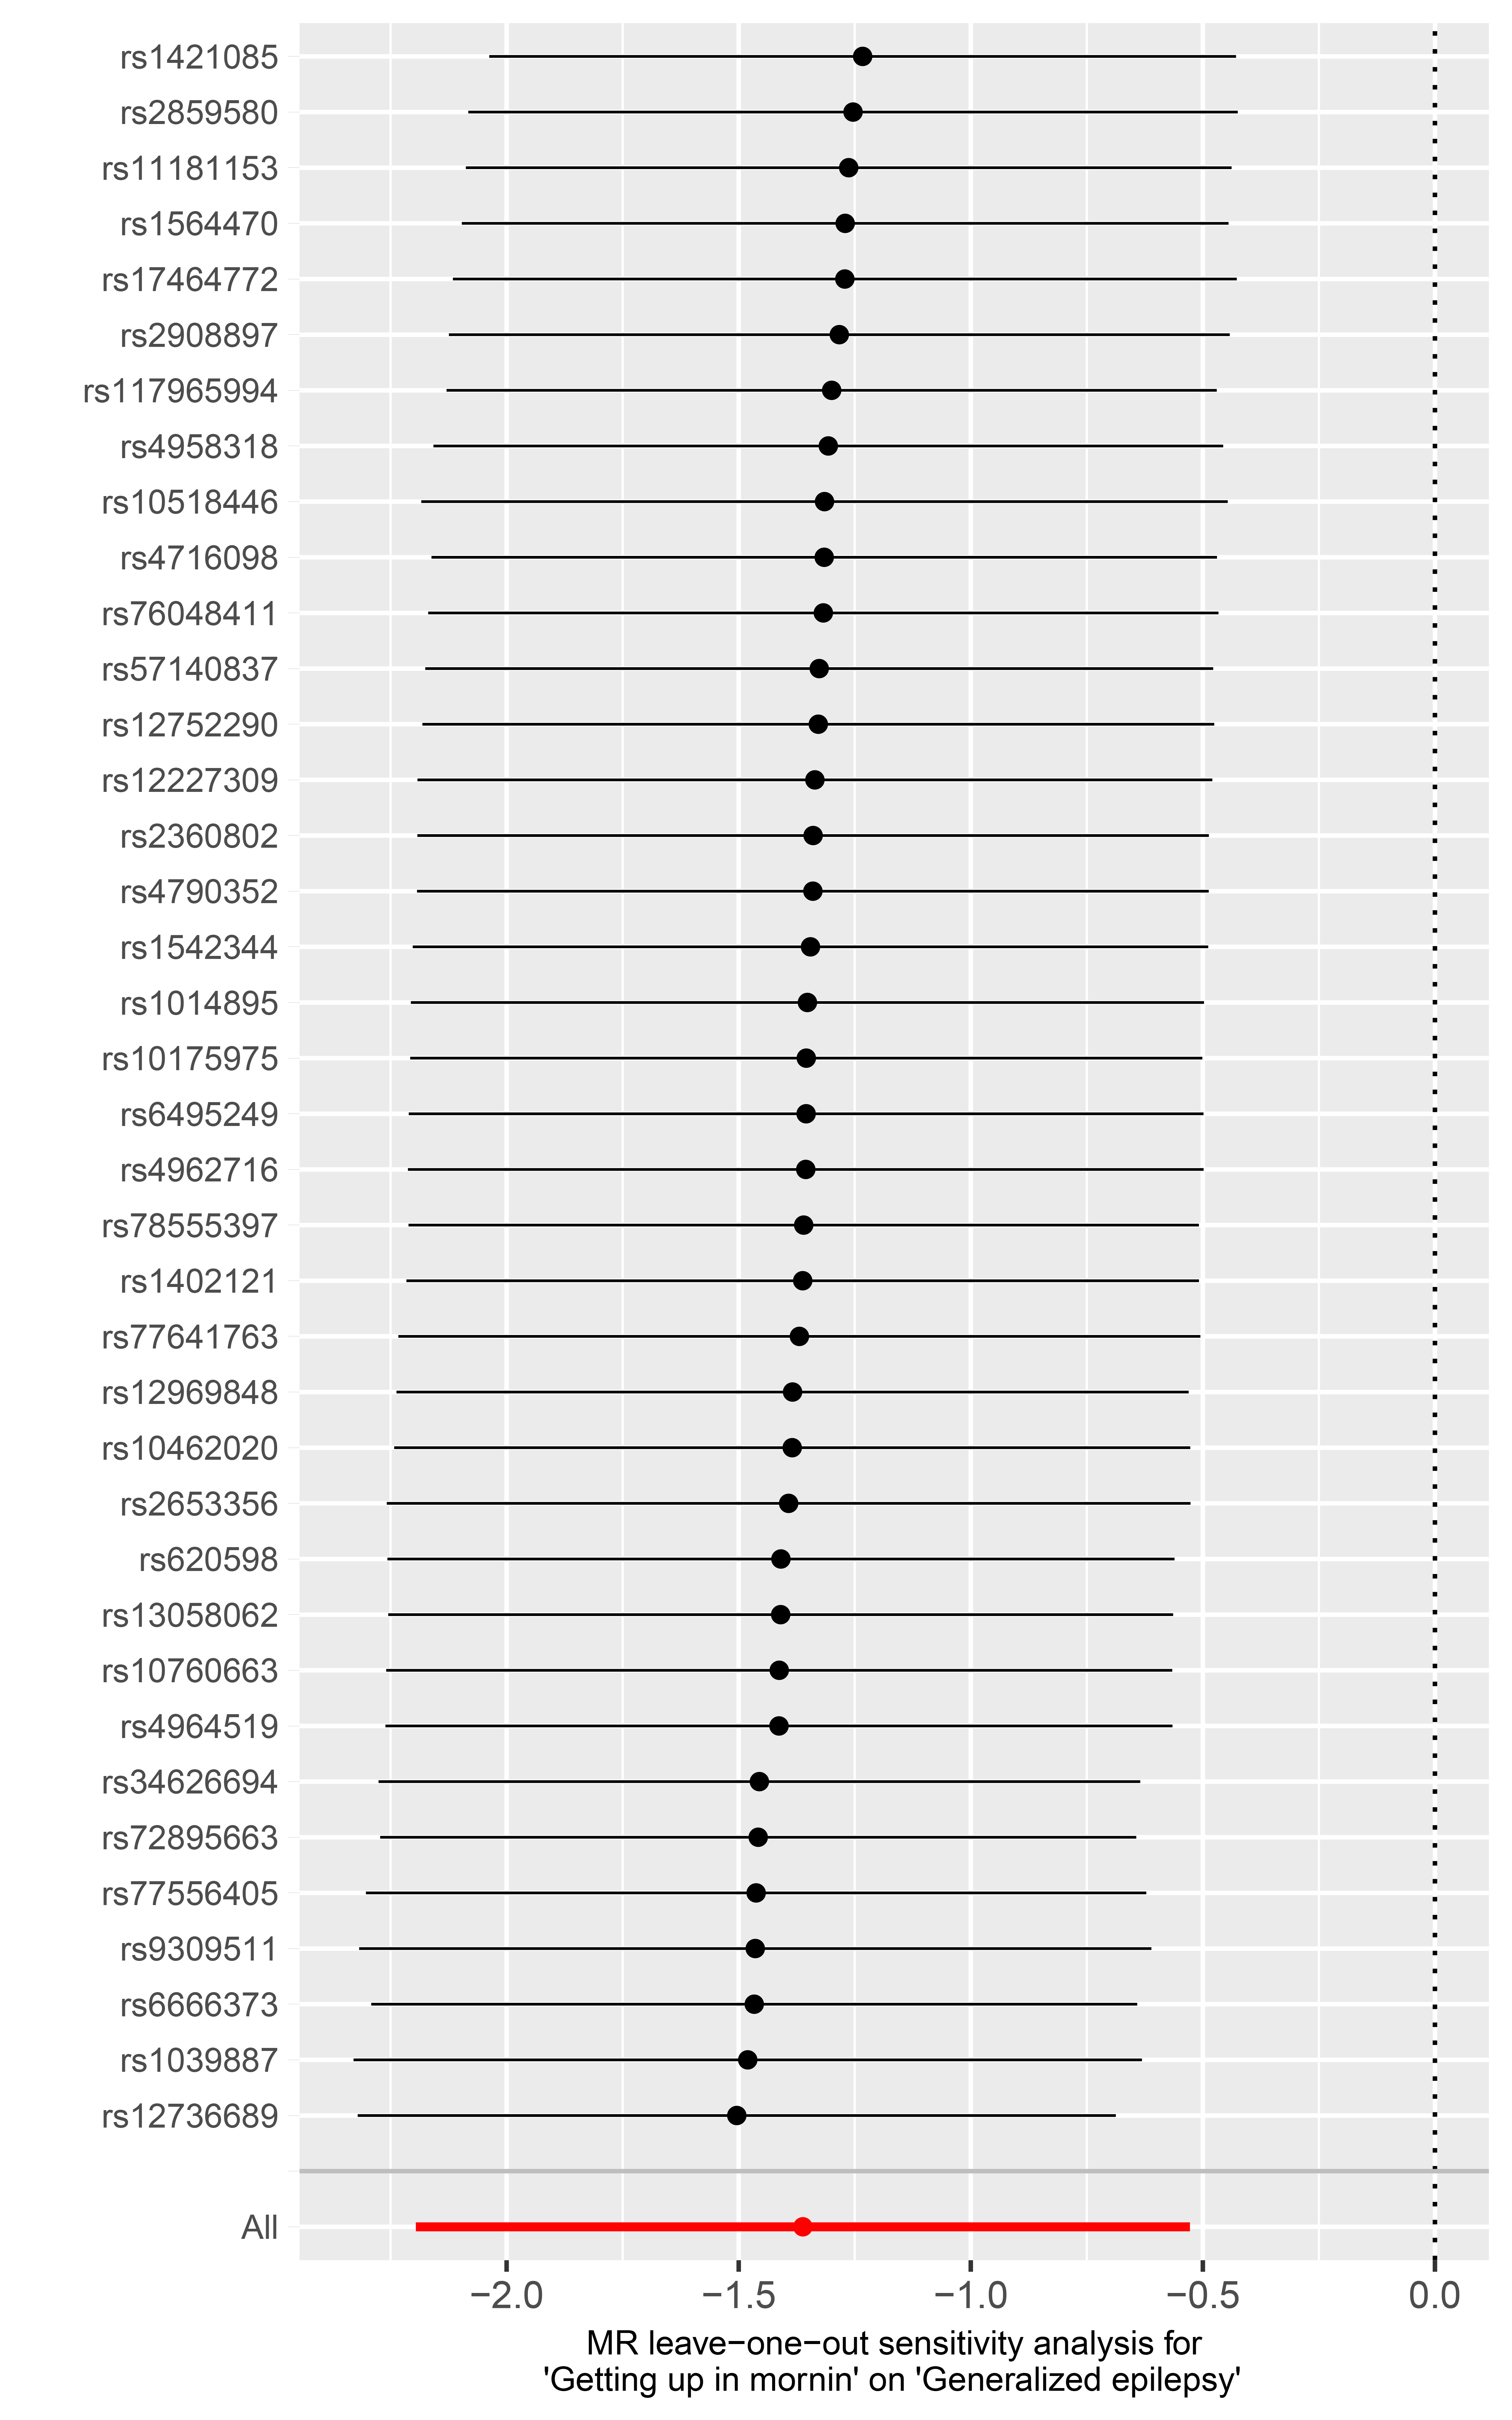
**

**Supplement Figure 1C**


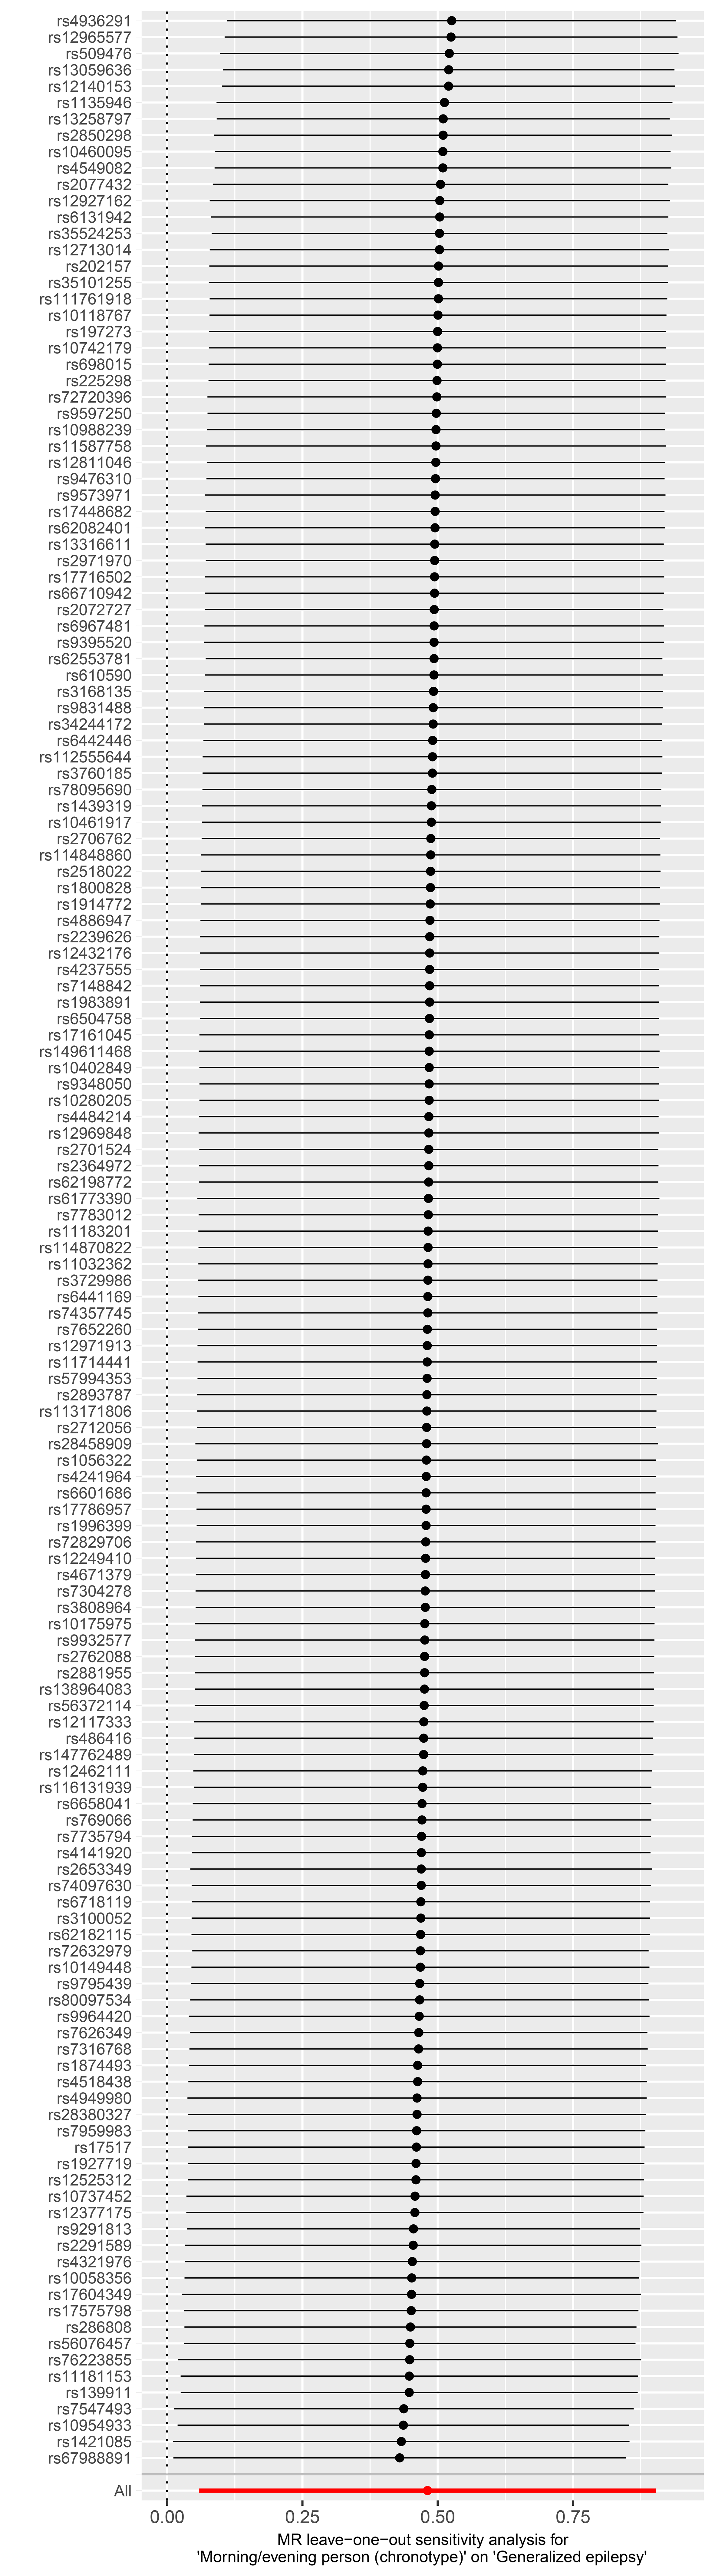


**Supplement Figure 1D**

**Supplement Figure 1**. The leave-one-out analysis the causal relationship between sleep traits and epilepsy risk in Europeans. (A) getting up in morning and epilepsy risk in Europeans; (B) morning/evening person (chronotype) and epilepsy risk in Europeans; (C) getting up in morning and generalized epilepsy risk in Europeans; (D) morning/evening person (chronotype) and generalized epilepsy risk in Europeans.


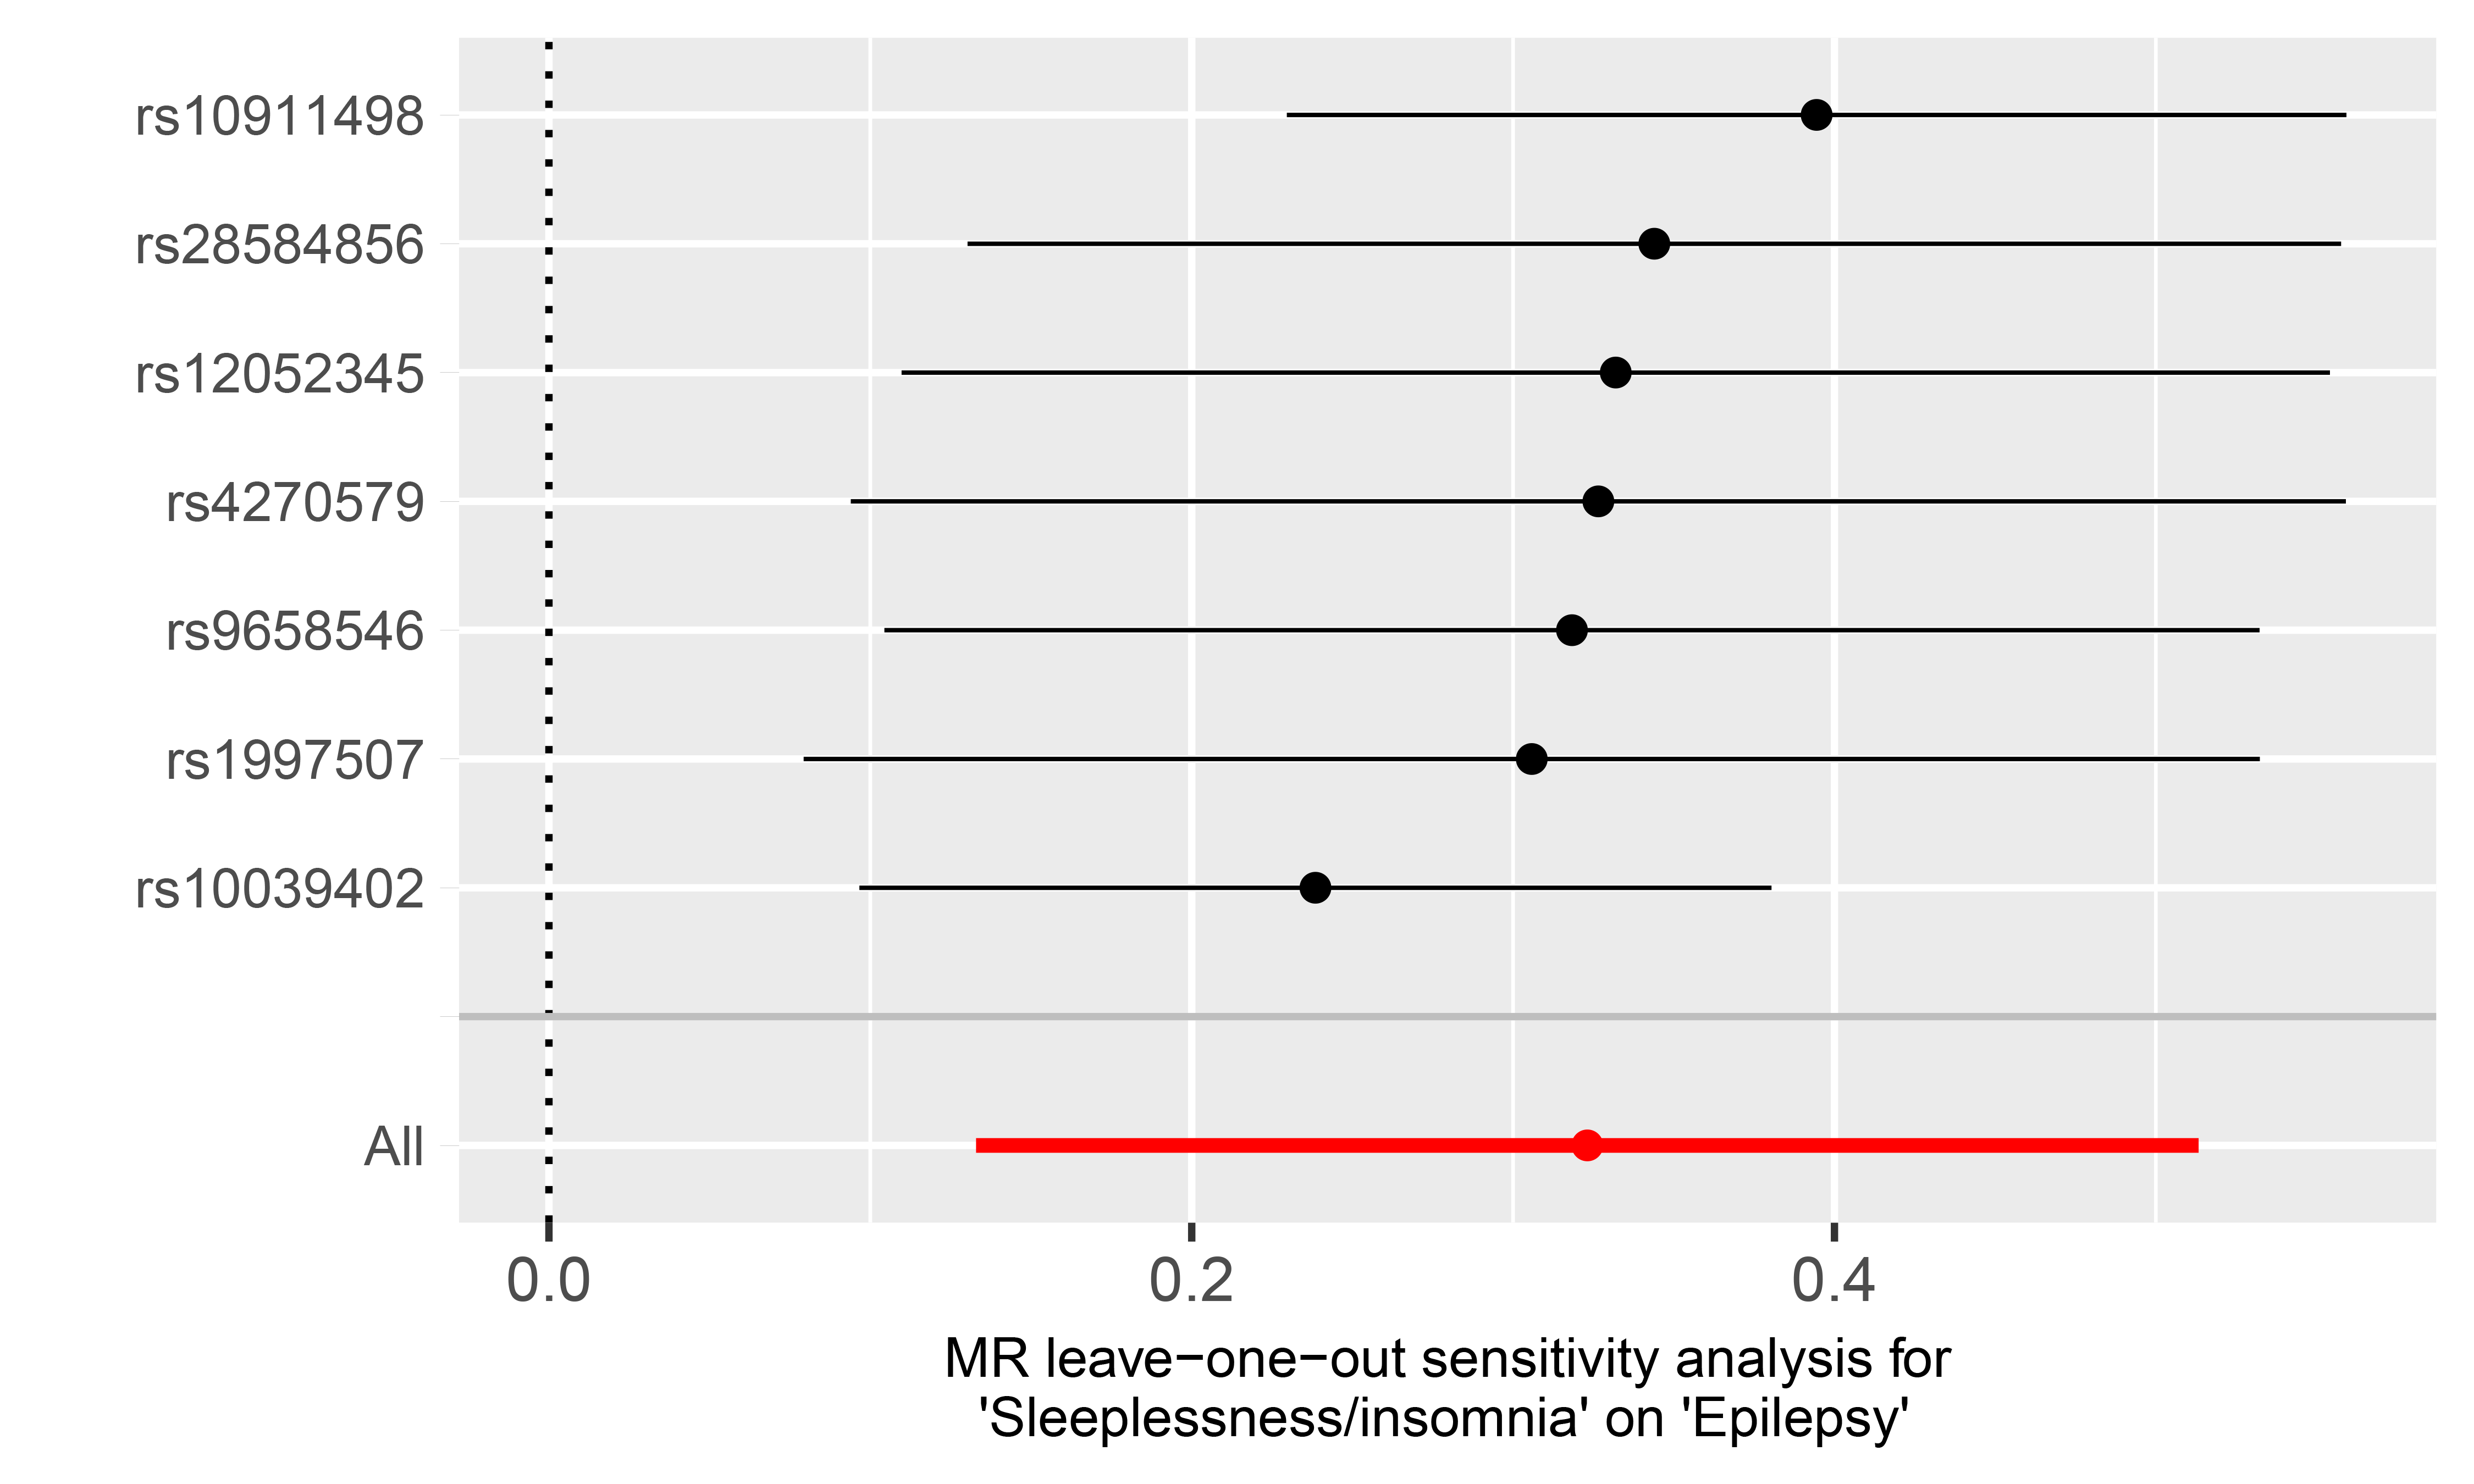


**Supplement Figure 2**. The leave-one-out analysis the causal relationship between s sleeplessness/insomnia and epilepsy risk in East Asians.
